# Supplementary material for: Distinct surface response to black carbon aerosols
Source: Copernicus journal article supplement (doi:10.5194/acp-21-13797-2021), 2021-09-17
Supplement: Supplementary file 1 [file acp-21-13797-2021-supplement.pdf]

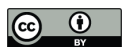

*Supplement of*

## **Distinct surface response to black carbon aerosols**

**Tao Tang et al.**

*Correspondence to:* Tao Tang (tao.tang@yale.edu)

The copyright of individual parts of the supplement might differ from the article licence.

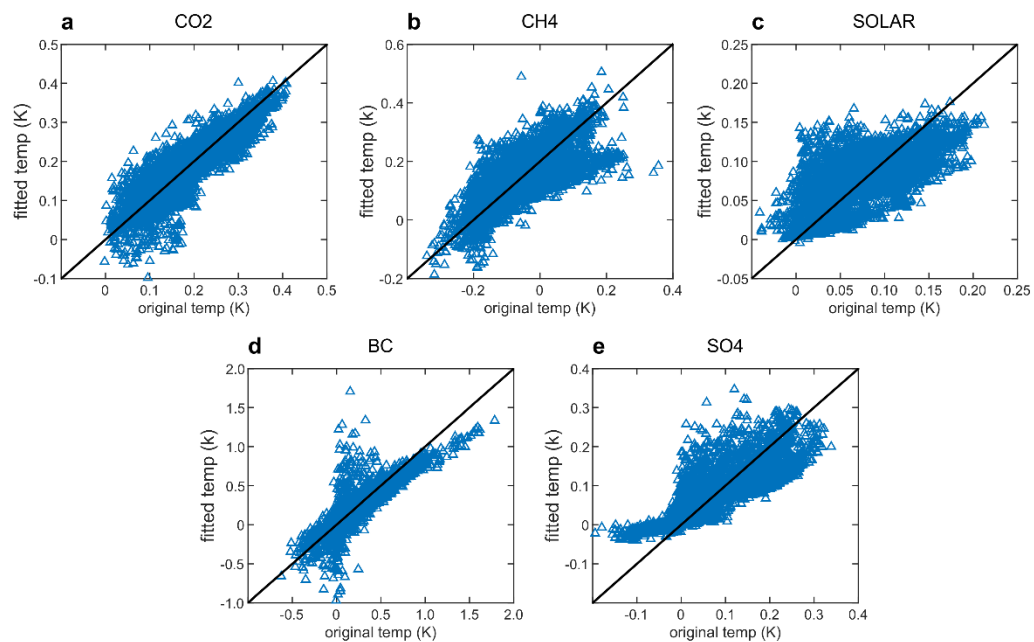

**Figure S1: Comparison of original  $\Delta T$  and fitted  $\Delta T$  from the linear regression models. The black thick lines in each plot are one-one lines.**

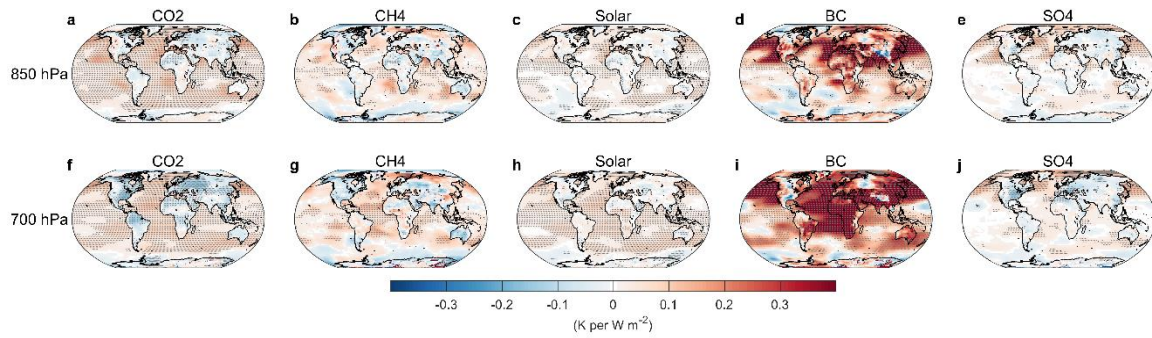

**Figure S2:** Same as Figure 3 in the main text, but for LTS of 850 hPa and 700 hPa. Positive anomalies indicate more stable atmosphere.

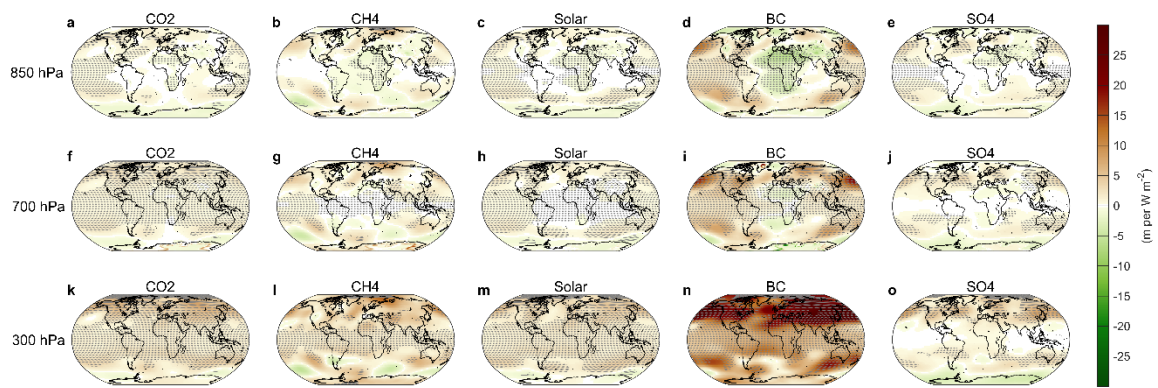

**Figure S3:** Same as Figure 3 in the main text, but for geopotential height changes at 850 hPa, 700 hPa and 300 hPa.

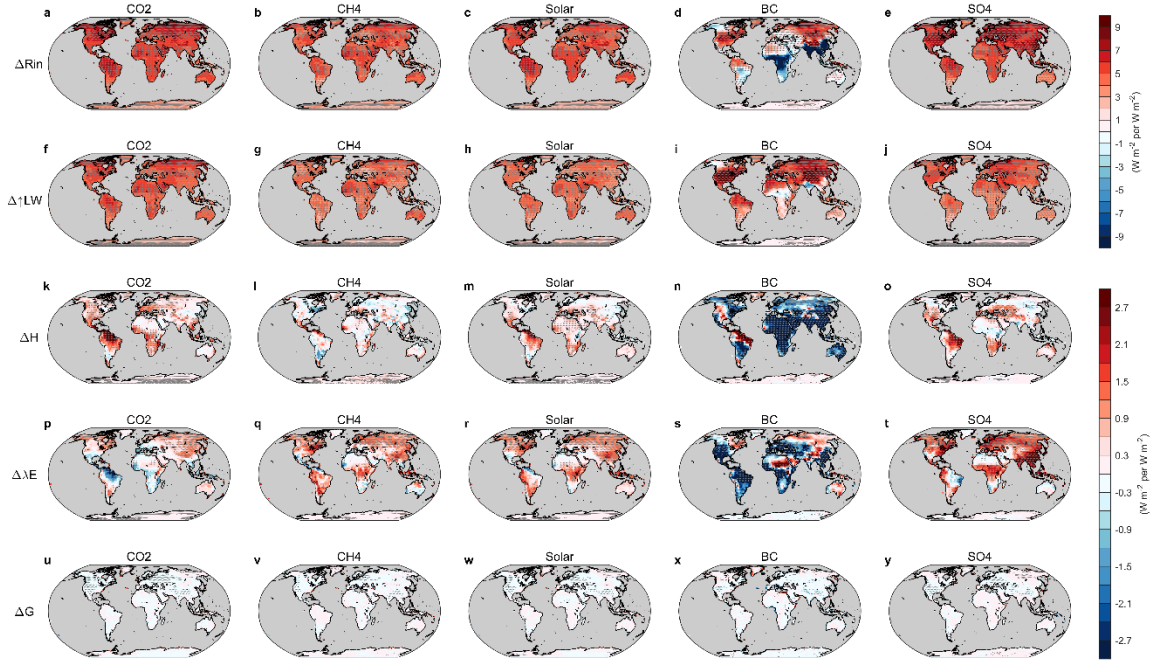

**Figure S4:** Same as Fig. 3 in the main text, but for the coupled simulations (near-equilibrium state).

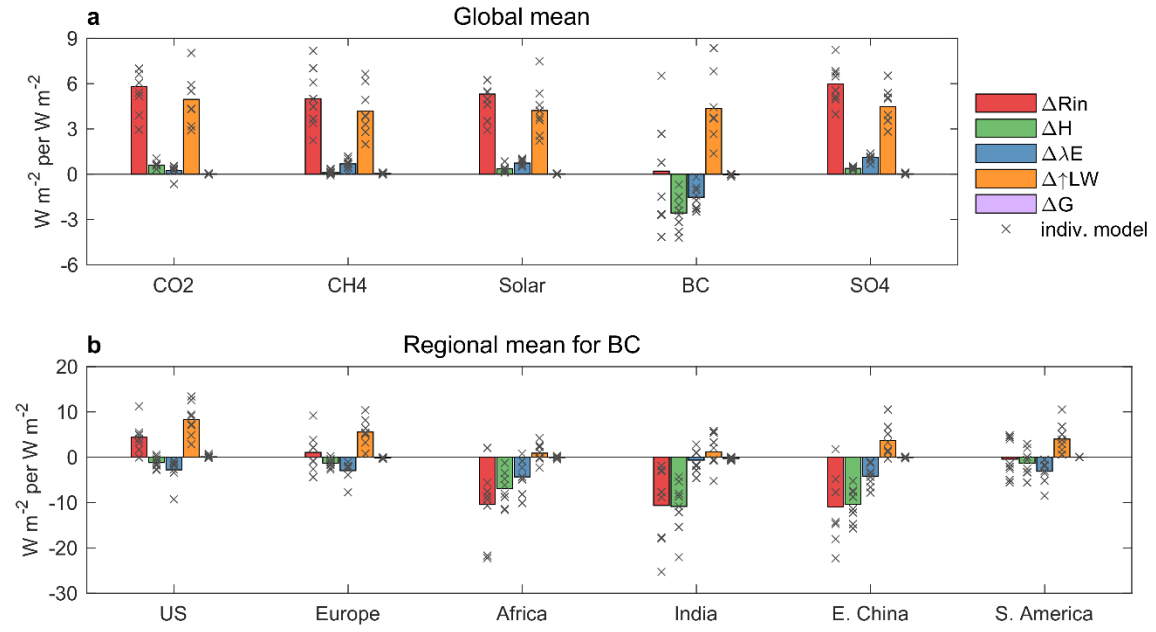

**Figure S5:** Same as Fig. 4 in the main text, but for the coupled simulations (near-equilibrium state).

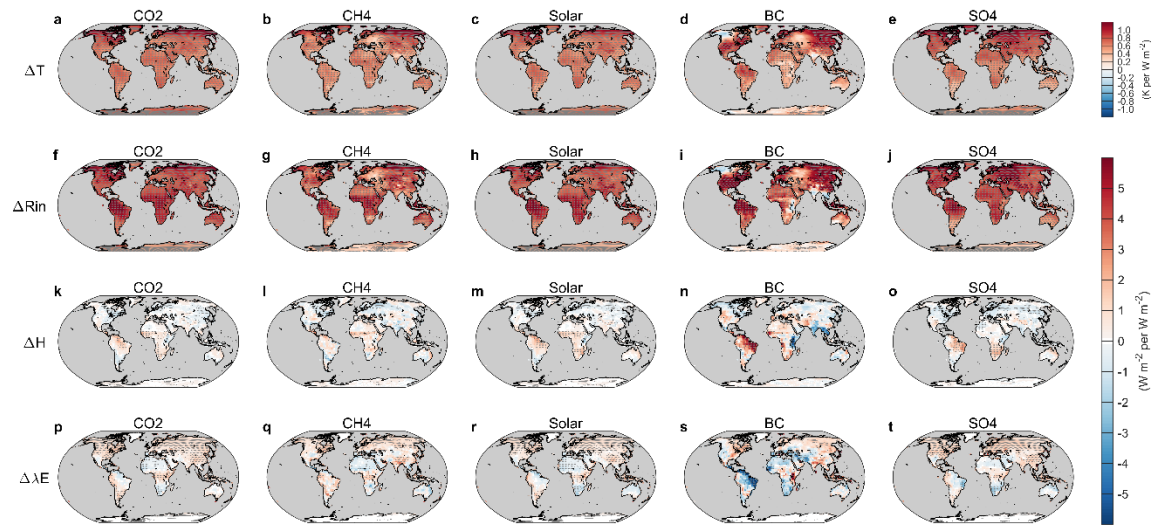

**Figure S6:** Same as Fig. 3 in the main text, but for the slow response, which is obtained by subtracting fast simulations from coupled simulations.
